# Supplementary material
Source: Springer Nature journal article supplement (https://www.springermedizin.de/resource/supplementary/12245_2011_75_MOESM2_ESM.pdf/9672754)

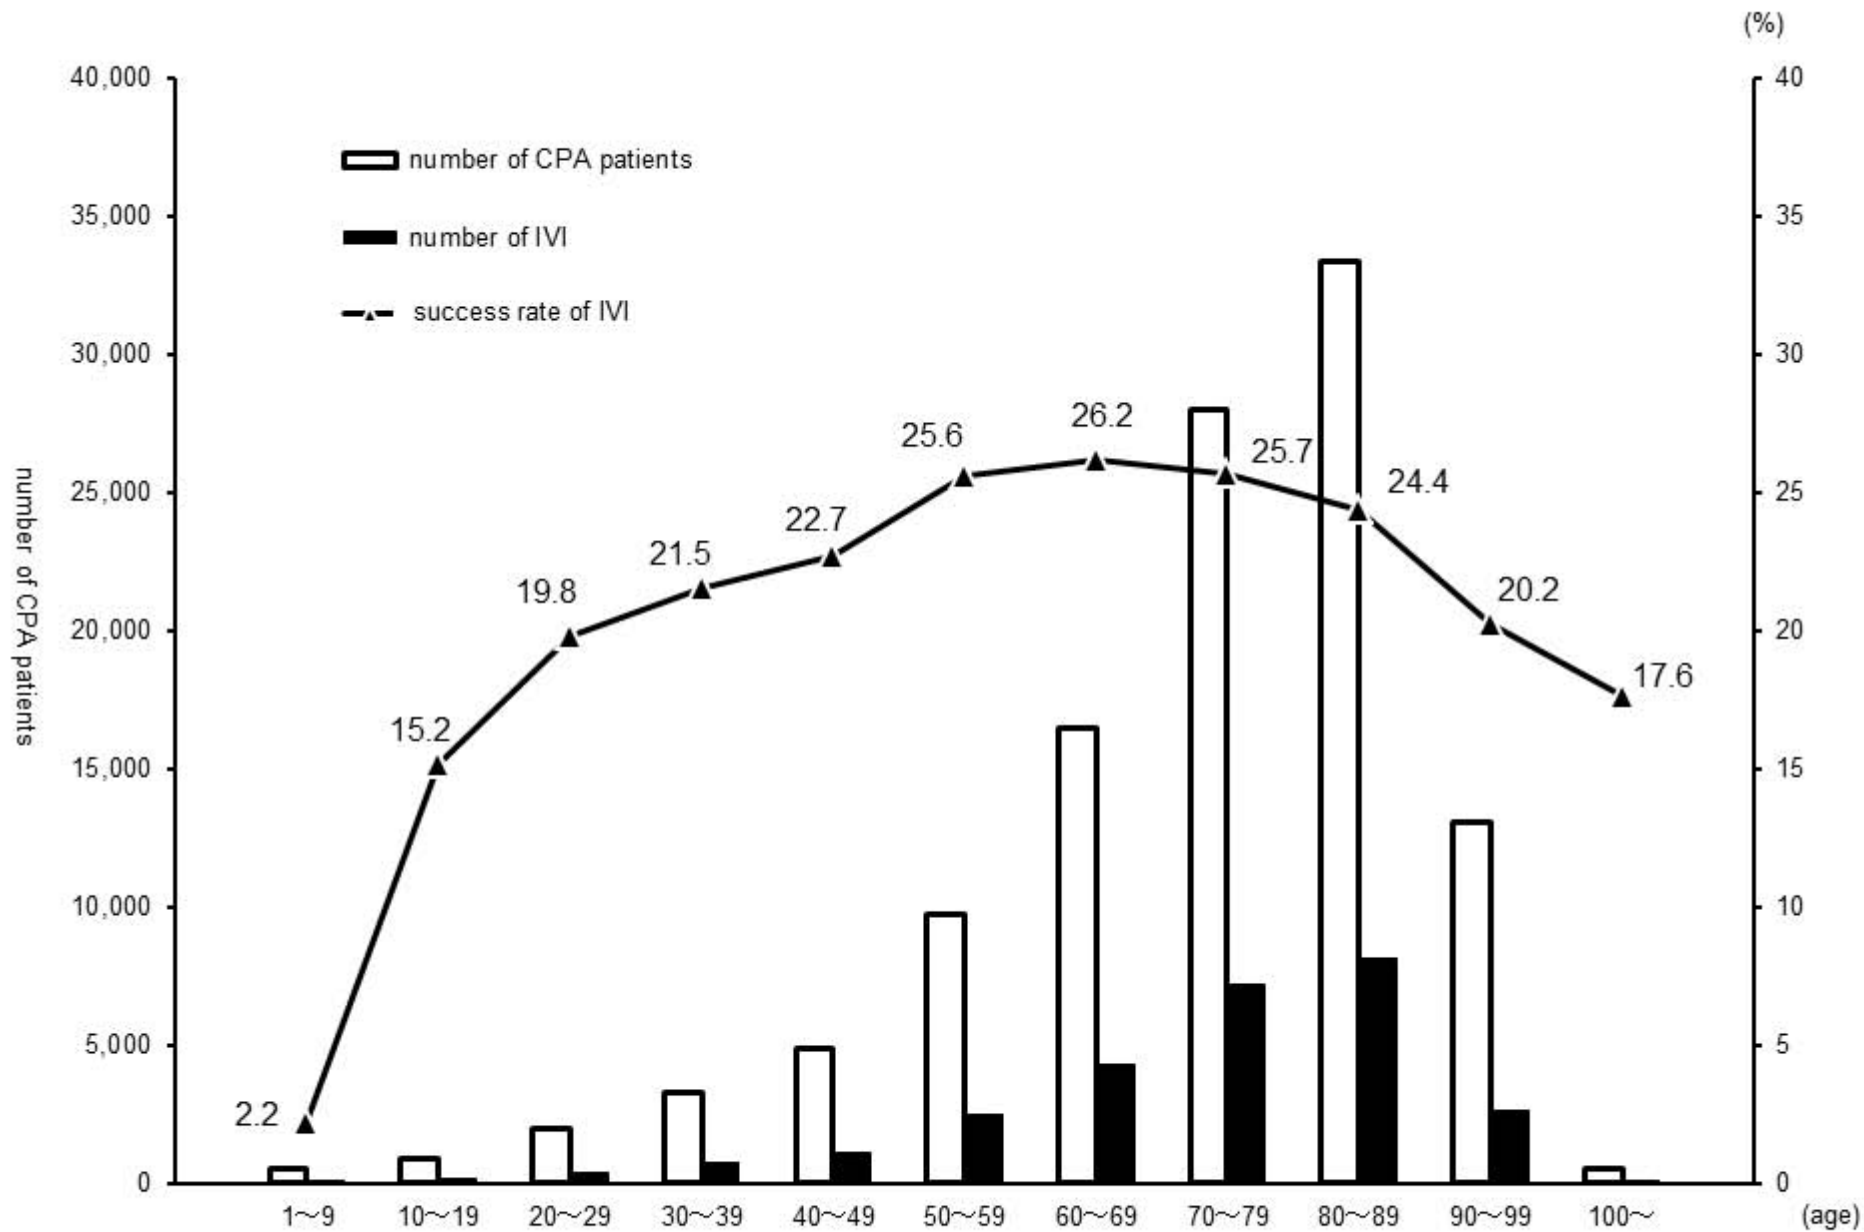

Supplement: MOESM2 [file 9672754]
